# Supplementary material
Source: HighWire-hosted journal article supplement (https://www.cmaj.ca/highwire/filestream/58687/field_highwire_adjunct_files/1/neo-steinhoff-2-at.pdf)
Supplement: neo-steinhoff-2-at.pdf [file neo-steinhoff-2-at.pdf]

| Appendix 2 (as supplied by authors): Respiratory infections with fever greater than 38° among mothers and infants,* by influenza period and vaccine group |                                                      |                      |                |                                                  |                     |                |
|-----------------------------------------------------------------------------------------------------------------------------------------------------------|------------------------------------------------------|----------------------|----------------|--------------------------------------------------|---------------------|----------------|
| Group; outcome                                                                                                                                            | No influenza virus circulating, Sept. 2004–Jan. 2005 |                      |                | Influenza virus circulating, Feb. 2005–Oct. 2005 |                     |                |
|                                                                                                                                                           | Control                                              | Influenza            | <i>p</i> value | Control                                          | Influenza           | <i>p</i> value |
| Mothers, no.                                                                                                                                              | 107                                                  | 104                  |                | 59                                               | 64                  |                |
| Episodes of respiratory illness with fever, no.                                                                                                           | 17                                                   | 14                   |                | 16                                               | 5                   |                |
| Person-months                                                                                                                                             | 654                                                  | 649                  |                | 422                                              | 440                 |                |
| Incidence/100 person-months (95% CI)                                                                                                                      | 2.60 (1.51 to 4.16)                                  | 2.16 (1.18 to 3.62)  |                | 3.79 (2.17 to 6.16)                              | 1.14 (0.37 to 2.65) |                |
| Incidence difference (95% CI)                                                                                                                             | –0.44 (–2.12 to 1.23)                                |                      |                | –2.66 (–4.76 to –0.55)                           |                     |                |
| Incidence rate ratio (95% CI)                                                                                                                             | 0.83 (0.41 to 1.68)                                  |                      |                | 0.6                                              | 0.30 (0.11 to 0.82) | 0.01           |
| Infants, no.                                                                                                                                              | 109                                                  | 102                  |                | 57                                               | 52                  |                |
| Episodes of respiratory illness with fever, no.                                                                                                           | 20                                                   | 22                   |                | 57                                               | 34                  |                |
| Person-months                                                                                                                                             | 278                                                  | 265                  |                | 592                                              | 613                 |                |
| Incidence/100 person-months (95% CI)                                                                                                                      | 7.19 (4.39 to 11.11)                                 | 8.30 (5.20 to 12.57) |                | 9.63 (7.29 to 12.47)                             | 5.55 (3.84 to 7.75) |                |
| Incidence difference (95% CI)                                                                                                                             | 1.11(–3.58 to 5.80)                                  |                      |                | –4.08                                            | (–7.2 to –0.96)     |                |
| Incidence rate ratio (95% CI)                                                                                                                             | 1.15 (0.63 to 2.11)                                  |                      |                | 0.7                                              | 0.58 (0.38 to 0.88) | 0.01           |
| *All mothers and infants with morbidity data included.                                                                                                    |                                                      |                      |                |                                                  |                     |                |
